# Supplementary material for: DNA Repair Pathway in Ovarian Cancer Patients Treated with HIPEC
Source: MDPI journal article supplement (doi:10.3390/ijms24108868), 2023-05-17
Supplement: s1 [file s1]

**Table S1.** List of gene expression assay used for this study. BER - base excision repair; SDDA – genes defective in diseases associated with sensitivity to DNA damaging agents; HR – homologous recombination; FA – Fanconi anemia; NER - nucleotide excision repair; EPN – editing and processing nucleases; NHEJ – non-homologous end joining; DRD – direct reversal of damage; MMR - mismatch repair; DP - DNA polymerases; UM - ubiquitination and modification. Reference genes are marked with the symbol (\*).

| Gene ID | RefSeq    | Assay ID       | OMIM number | DNA repair pathways |
|---------|-----------|----------------|-------------|---------------------|
| APEX1   | NM_080649 | qHsaCID0012533 | 107748      | BER                 |
| APEX2   | NM_014481 | qHsaCED0046611 | 300773      | BER                 |
| ATM     | NM_000051 | qHsaCED0045448 | 607585      | SDDA                |
| ATP23   | NM_033276 | qHsaCID0008603 | 619760      | Others              |
| ATR     | NM_001184 | qHsaCID0022638 | 601215      | Others              |
| ATXN3   | NM_004993 | qHsaCED0037933 | 607047      | Others              |
| BRCA1   | NM_007294 | qHsaCED0038604 | 113705      | HR                  |
| BRCA2   | NM_000059 | qHsaCED0044922 | 600185      | FA                  |
| BRIP1   | NM_032043 | qHsaCED0044695 | 605882      | FA                  |
| CCNH    | NM_001239 | qHsaCID0007234 | 601953      | NER                 |
| CCNO    | NM_021147 | qHsaCED0002266 | 607752      | Others              |
| CDK7    | NM_001799 | qHsaCED0044530 | 601955      | NER                 |
| DDB1    | NM_001923 | qHsaCID0021586 | 600045      | NER                 |
| DDB2    | NM_000107 | qHsaCID0016961 | 600811      | NER                 |
| DMC1    | NM_007068 | qHsaCID0017628 | 602721      | HR                  |
| ERCC1   | NM_001983 | qHsaCID0008822 | 126380      | NER                 |
| ERCC2   | NM_000400 | qHsaCID0037822 | 126340      | NER                 |
| ERCC3   | NM_000122 | qHsaCED0046050 | 133510      | NER                 |
| ERCC4   | NM_005236 | qHsaCID0018113 | 133520      | NER                 |
| ERCC5   | NM_000123 | qHsaCED0044577 | 133530      | NER                 |
| ERCC6   | NM_000124 | qHsaCED0048692 | 609413      | NER                 |
| ERCC8   | NM_000082 | qHsaCED0042118 | 609412      | NER                 |
| EXO1    | NM_130398 | qHsaCED0035328 | 606063      | EPN                 |
| FEN1    | NM_004111 | qHsaCED0036761 | 600393      | EPN                 |
| LIG1    | NM_000234 | qHsaCID0008449 | 126391      | NER                 |
| LIG3    | NM_002311 | qHsaCID0018427 | 600940      | BER                 |
| LIG4    | NM_002312 | qHsaCED0047042 | 601837      | NHEJ                |
| MGMT    | NM_002412 | qHsaCED0036780 | 156569      | DRD                 |
| MLH1    | NM_000249 | qHsaCED0042382 | 120436      | MMR                 |
| MLH3    | NM_014381 | qHsaCID0021156 | 604395      | MMR                 |
| MMS19   | NM_022362 | qHsaCED0002239 | 614777      | NER                 |
| MPG     | NM_002434 | qHsaCED0057200 | 156565      | BER                 |
| MRE11A  | NM_005590 | qHsaCED0042016 | 600814      | HR                  |

|        |           |                |        |        |
|--------|-----------|----------------|--------|--------|
| MSH2   | NM_000251 | qHsaCED0042676 | 609309 | MMR    |
| MSH3   | NM_002439 | qHsaCED0043488 | 600887 | MMR    |
| MSH4   | NM_002440 | qHsaCED0042166 | 602105 | MMR    |
| MSH5   | NM_002441 | qHsaCED0038330 | 603382 | MMR    |
| MSH6   | NM_000179 | qHsaCED0043663 | 600678 | MMR    |
| MUTYH  | NM_012222 | qHsaCED0038608 | 604933 | BER    |
| NEIL1  | NM_024608 | qHsaCED0056614 | 608844 | BER    |
| NEIL2  | NM_145043 | qHsaCED0045633 | 608933 | BER    |
| NEIL3  | NM_018248 | qHsaCED0043285 | 608934 | BER    |
| NTHL1  | NM_002528 | qHsaCED0042216 | 602656 | BER    |
| OGG1   | NM_002542 | qHsaCED0043531 | 601982 | BER    |
| PARP1  | NM_001618 | qHsaCED0045162 | 173870 | BER    |
| PARP2  | NM_005484 | qHsaCED0044268 | 607725 | BER    |
| PARP3  | NM_005485 | qHsaCED0042084 | 607726 | BER    |
| PMS1   | NM_000534 | qHsaCID0022093 | 600258 | MMR    |
| PMS2   | NM_000535 | qHsaCED0043945 | 600259 | MMR    |
| PNKP   | NM_007254 | qHsaCID0014360 | 605610 | BER    |
| POLB   | NM_002690 | qHsaCED0056776 | 174760 | DP     |
| POLD3  | NM_006591 | qHsaCID0007030 | 611415 | DP     |
| POLL   | NM_013274 | qHsaCED0046360 | 606343 | DP     |
| PRKDC  | NM_006904 | qHsaCID0007587 | 600899 | NHEJ   |
| RAD18  | NM_020165 | qHsaCID0007443 | 605256 | UM     |
| RAD21  | NM_006265 | qHsaCED0046249 | 606462 | Others |
| RAD23A | NM_005053 | qHsaCED0037589 | 600061 | NER    |
| RAD23B | NM_002874 | qHsaCED0005365 | 600062 | NER    |
| RAD50  | NM_005732 | qHsaCID0013265 | 604040 | HR     |
| RAD51  | NM_002875 | qHsaCED0042133 | 179617 | HR     |
| RAD51B | NM_133509 | qHsaCID0036877 | 602948 | HR     |
| RAD51C | NM_058216 | qHsaCED0036407 | 602774 | FA     |
| RAD51D | NM_002878 | qHsaCED0047745 | 602954 | HR     |
| RAD52  | NM_134424 | qHsaCED0041872 | 600392 | HR     |
| RAD54L | NM_003579 | qHsaCED0042535 | 603615 | HR     |
| RFC1   | NM_002913 | qHsaCED0042061 | 102579 | Others |
| RPA1   | NM_002945 | qHsaCID0016650 | 179835 | NER    |
| RPA3   | NM_002947 | qHsaCED0023169 | 179837 | NER    |
| SLK    | NM_014720 | qHsaCED0042224 | 616563 | Others |
| SMUG1  | NM_014311 | qHsaCED0037592 | 607753 | BER    |
| TDG    | NM_003211 | qHsaCED0004553 | 601423 | BER    |
| TOP3A  | NM_004618 | qHsaCED0047236 | 601243 | SDDA   |
| TOP3B  | NM_003935 | qHsaCID0008975 | 603582 | Others |
| TREX1  | NM_016381 | qHsaCED0048594 | 606609 | EPN    |
| UNG    | NM_003362 | qHsaCED0042383 | 191525 | BER    |
| XAB2   | NM_020196 | qHsaCID0017153 | 610850 | NER    |
| XPA    | NM_000380 | qHsaCID0022359 | 611153 | NER    |

|        |           |                |        |      |
|--------|-----------|----------------|--------|------|
| XPC    | NM_004628 | qHsaCED0045651 | 613208 | NER  |
| XRCC1  | NM_006297 | qHsaCID0023107 | 194360 | BER  |
| XRCC2  | NM_005431 | qHsaCID0015694 | 600375 | HR   |
| XRCC3  | NM_005432 | qHsaCID0014128 | 600675 | HR   |
| XRCC4  | NM_003401 | qHsaCID0016093 | 194363 | NHEJ |
| XRCC5  | NM_021141 | qHsaCID0011752 | 194364 | NHEJ |
| XRCC6  | NM_001469 | qHsaCED0048082 | 152690 | NHEJ |
| ACTB*  | NM_001101 | qHsaCED0036269 | 102630 |      |
| B2M*   | NM_004048 | qHsaCID0015347 | 109700 |      |
| GAPDH* | NM_002046 | qHsaCED0038674 | 138400 |      |
| HPRT1* | NM_000194 | qHsaCID0016375 | 308000 |      |
| RPLP0* | NM_001002 | qHsaCED0038653 | 180510 |      |

---

**Figure S1.** Heatmap of the association between transcript levels and *BRCA1/2* mutations in tumor tissue. BRCA 0 means wildtype, BRCA 1 means BRCA mutated, BER - base excision repair; DP - DNA polymerases; DRD – direct reversal of damage; EPN – editing and processing nucleases; FA – Fanconi anemia; HR – homologous recombination; MMR - mismatch repair; NER - nucleotide excision repair; NHEJ – non-homologous end joining; SDDA – genes defective in diseases associated with sensitivity to DNA damaging agents; UM - ubiquitination and modification.

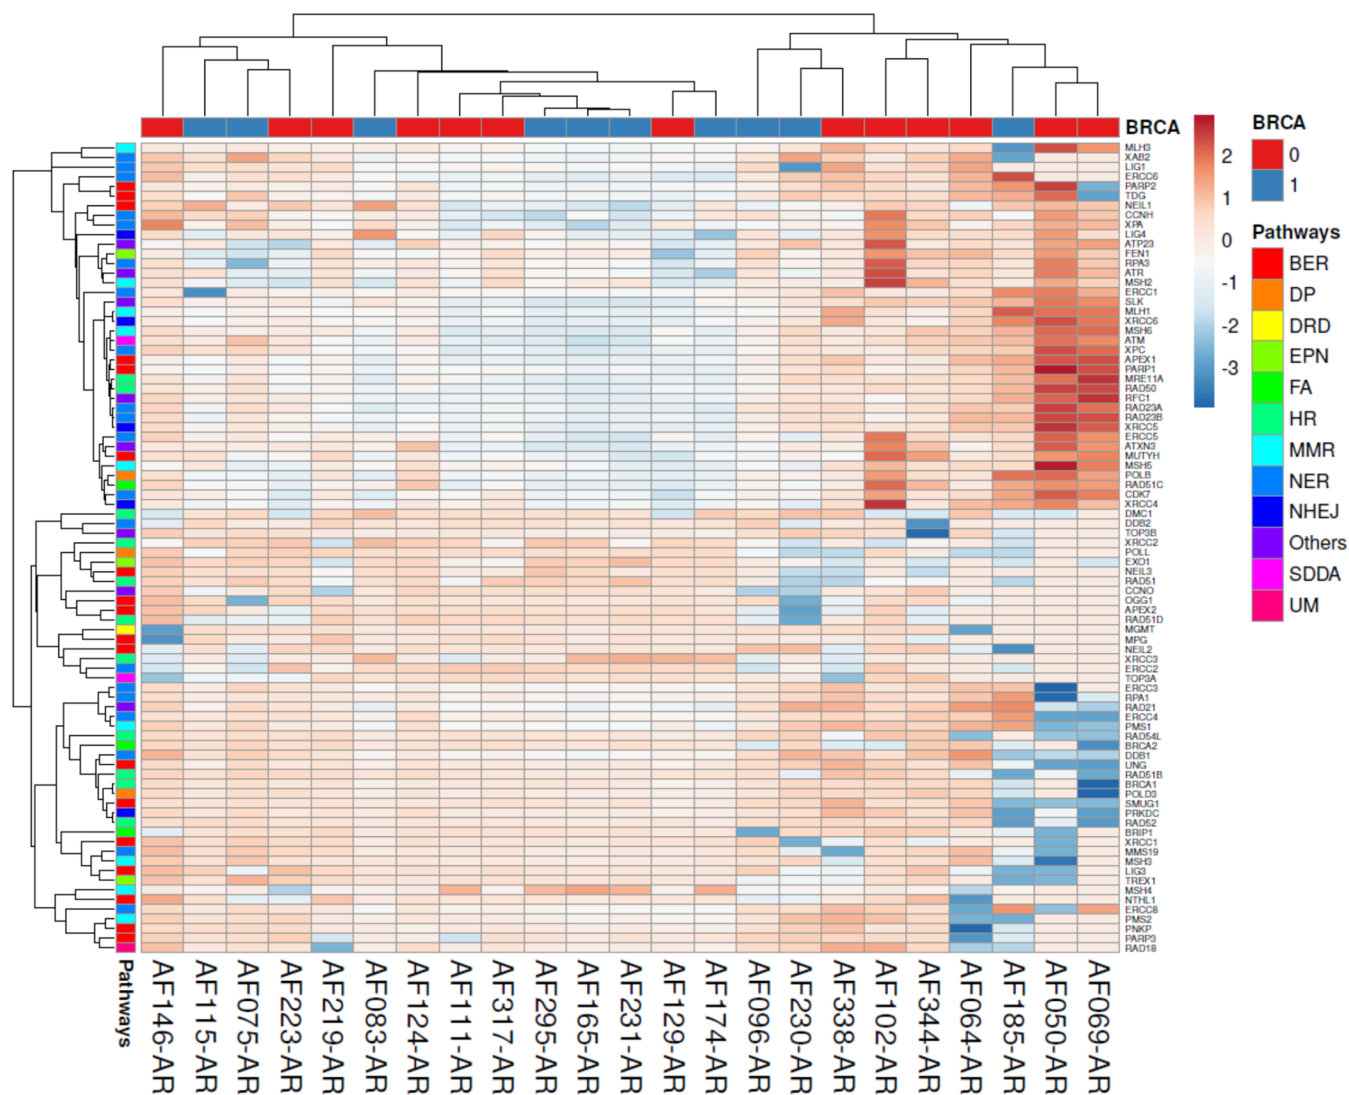

**Figure S2.** Heatmap of the association between transcript levels and *BRCA1/2* mutations in metastatic tissue.

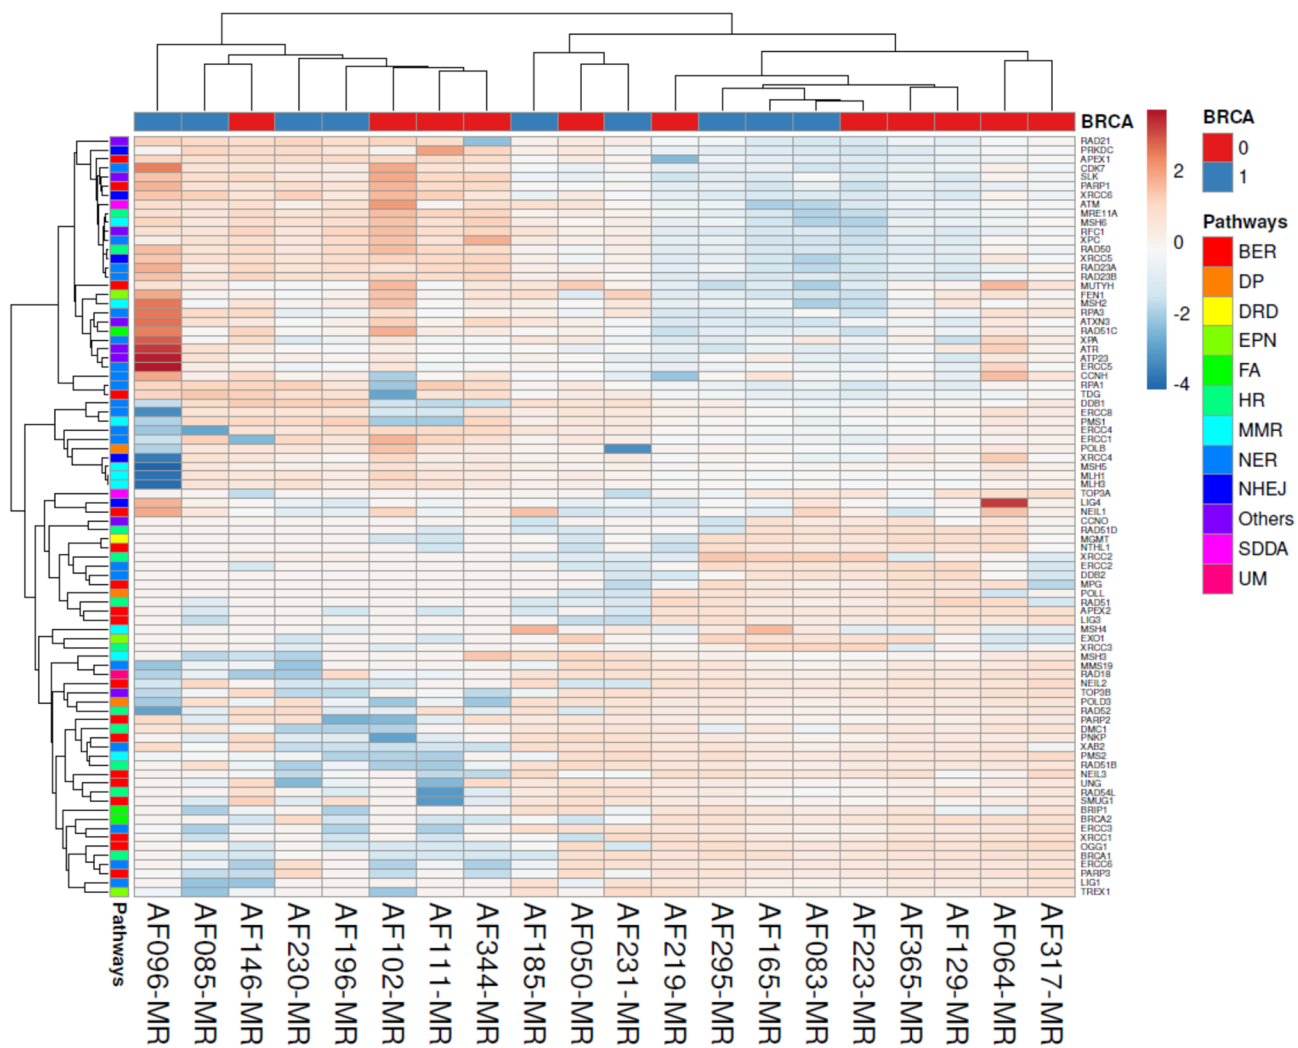

**Figure S3.** Heatmap of the association between transcript levels and peritoneal carcinomatosis in tumor tissue.

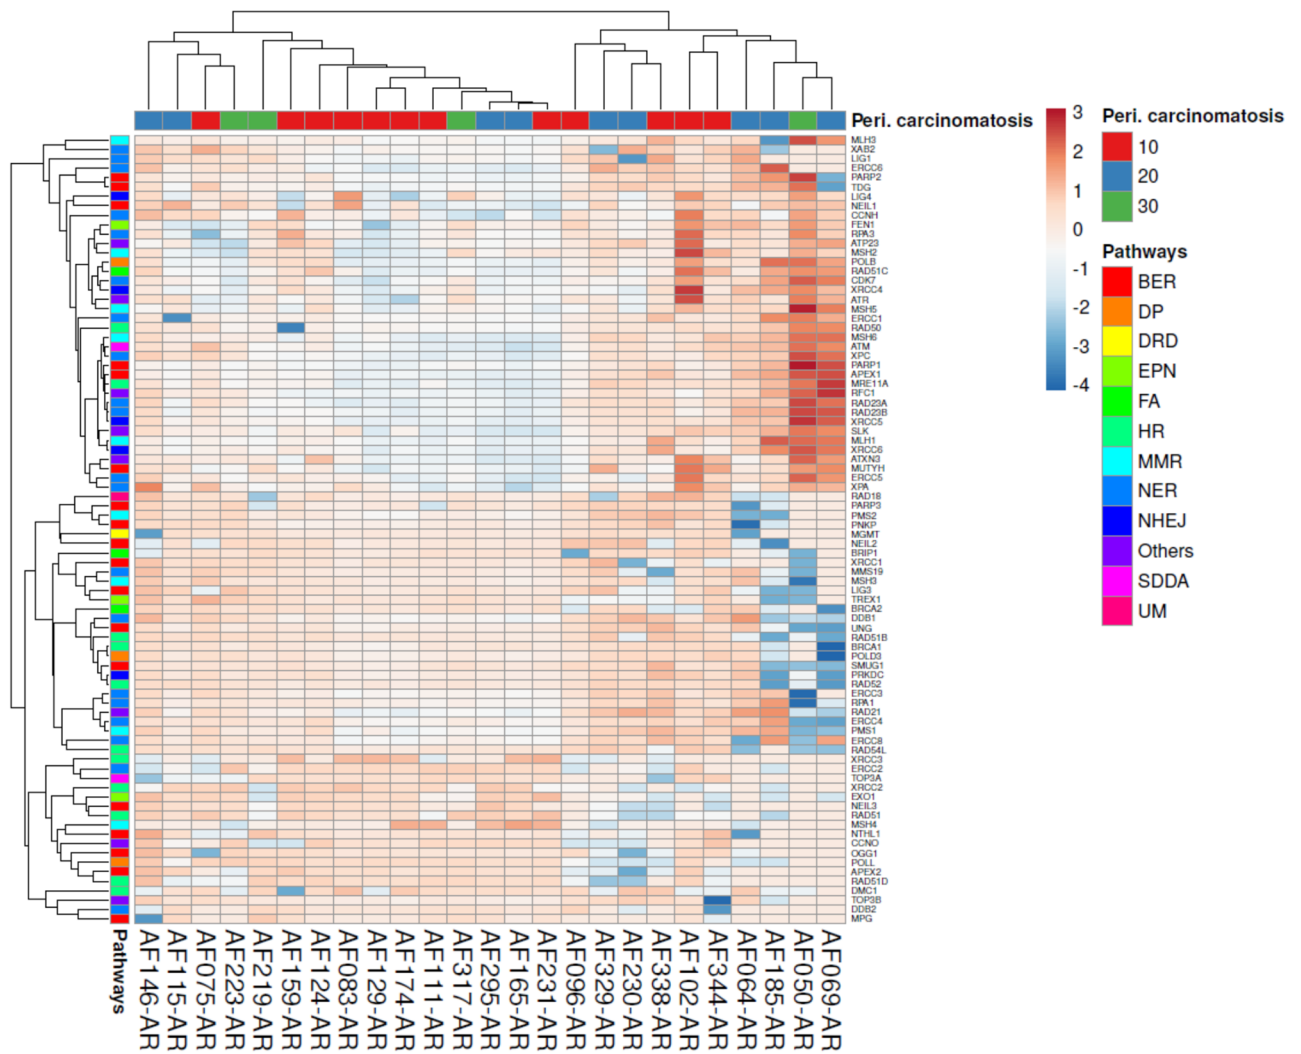

**Figure S4.** Heatmap of the association between transcript levels and peritoneal carcinomatosis in metastatic tissue.

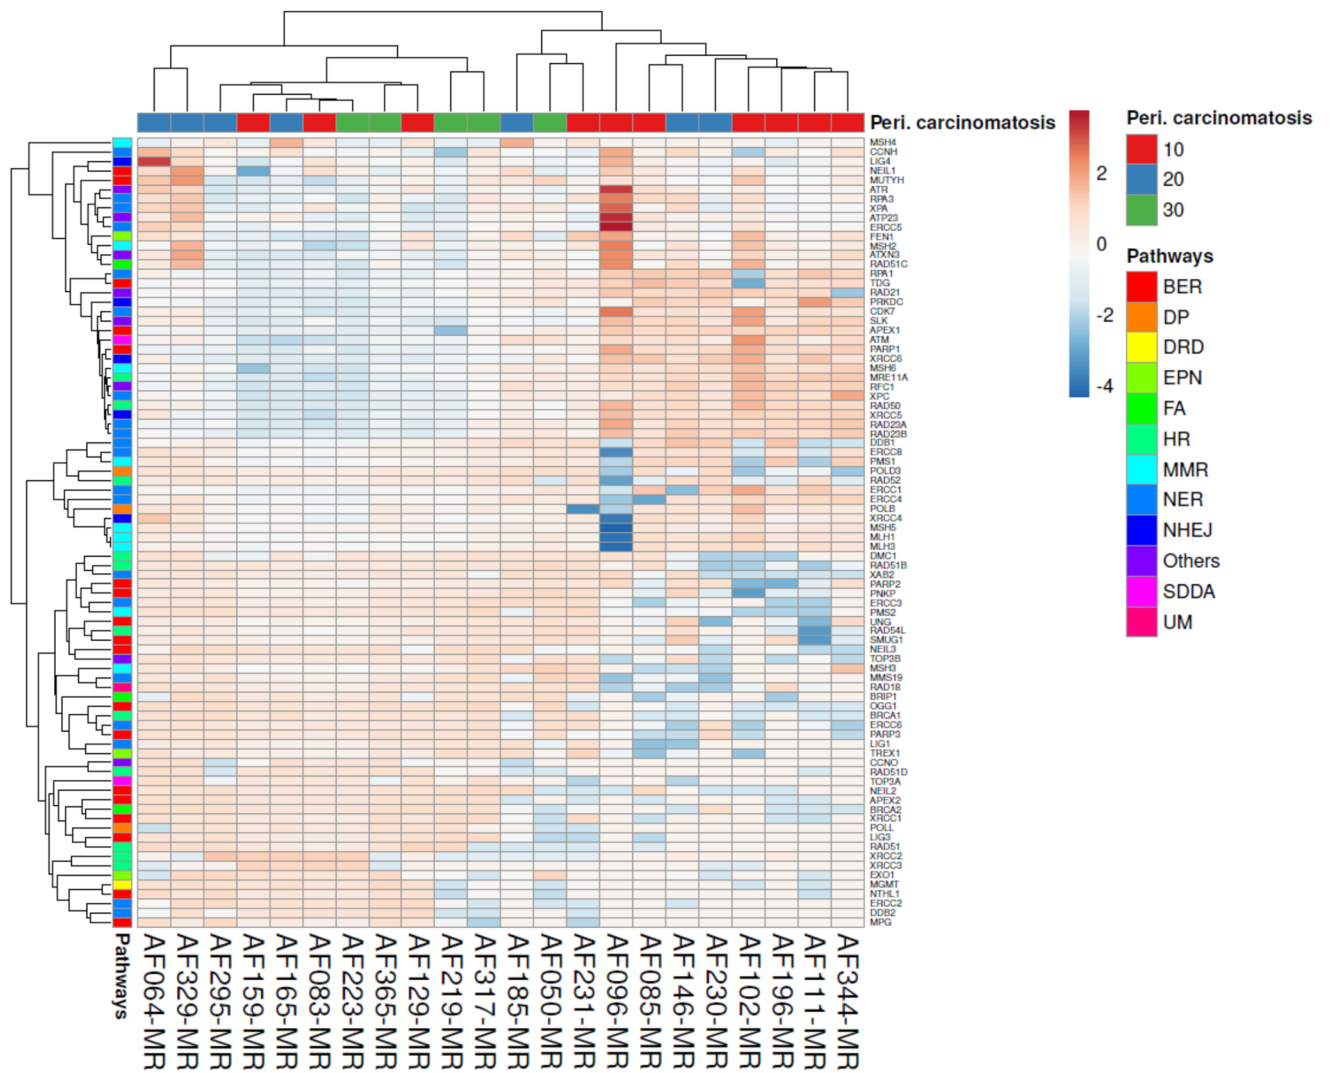

**Figure S5.** Heatmap of the association between transcript levels and therapy in tumor tissue.

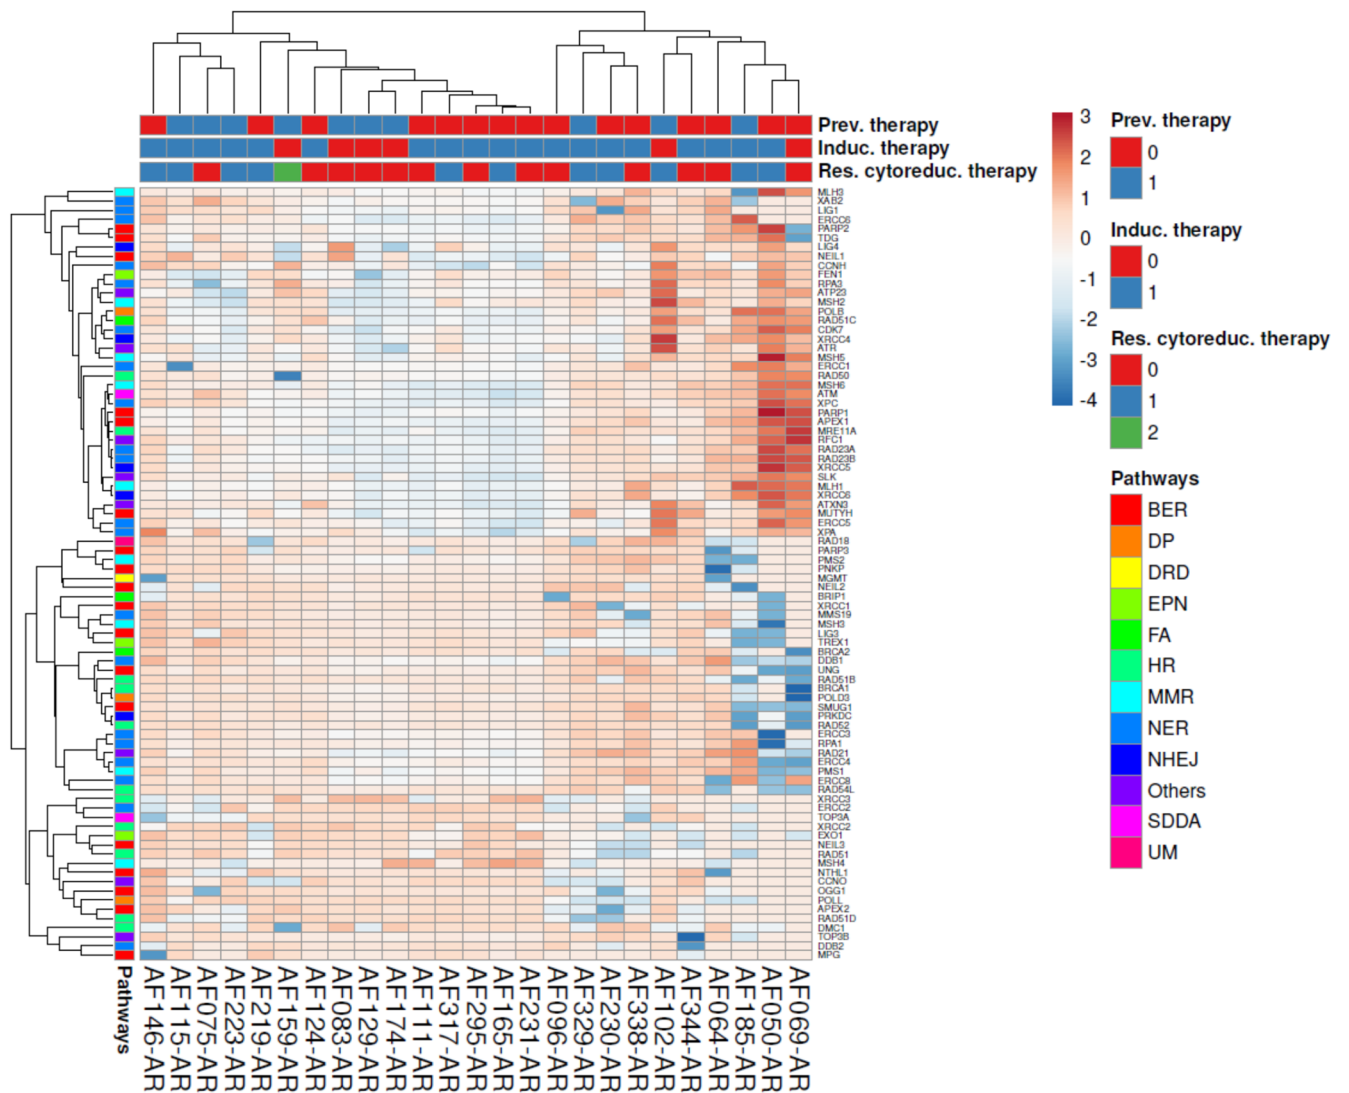



[illegible]

**Figure S7.** Heatmap comparing expression changes in tumor and metastatic tissue.

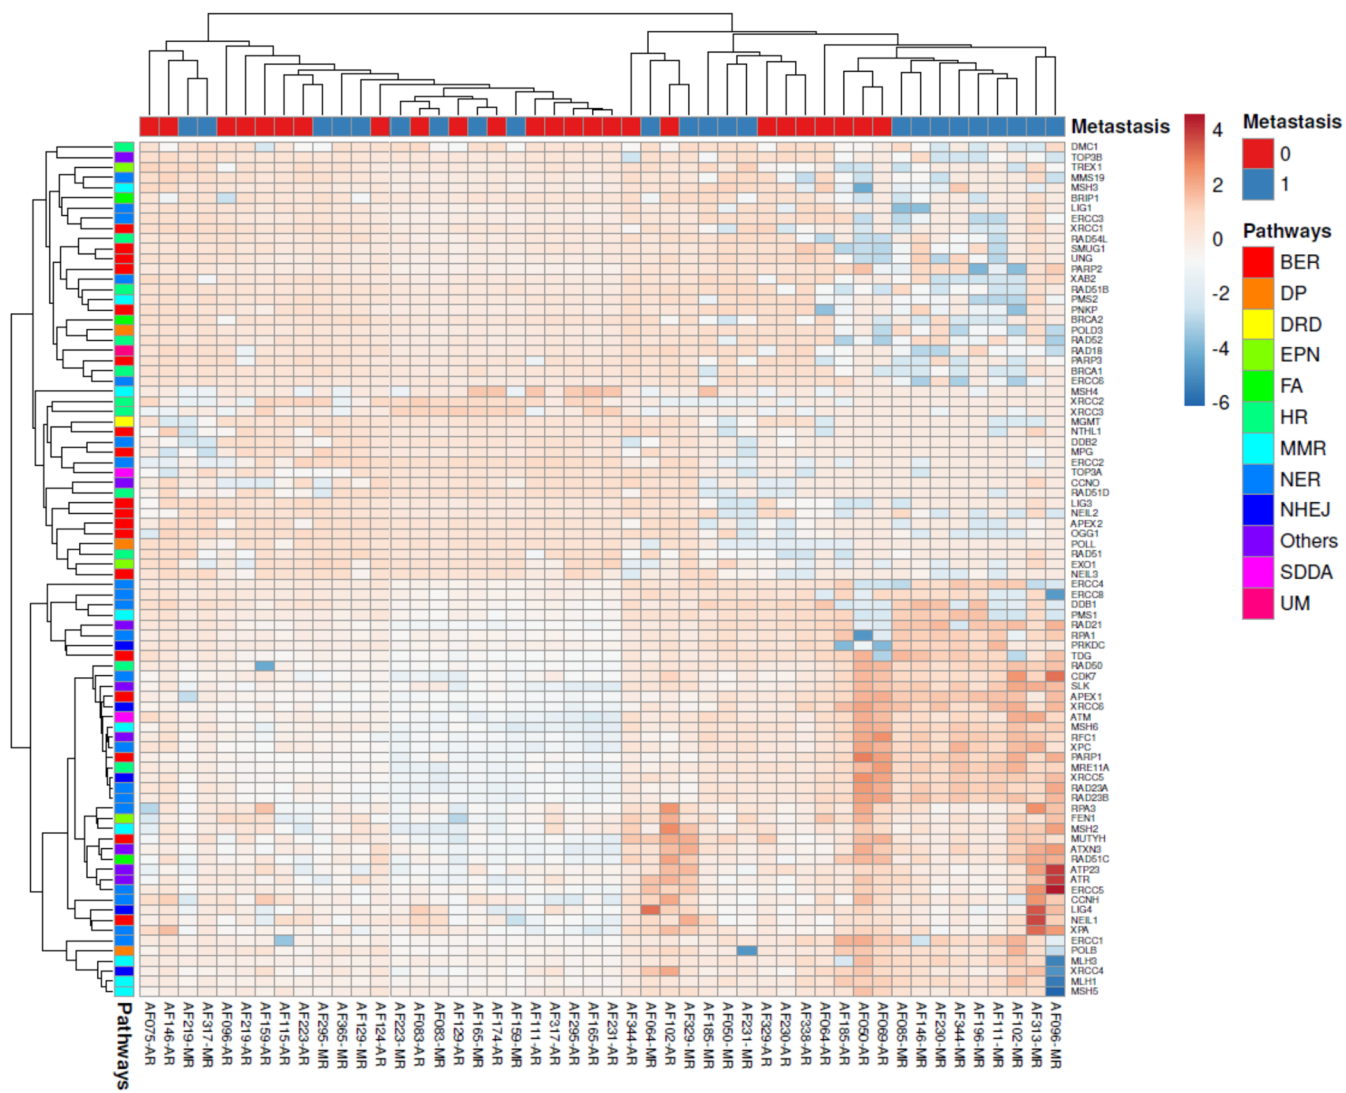

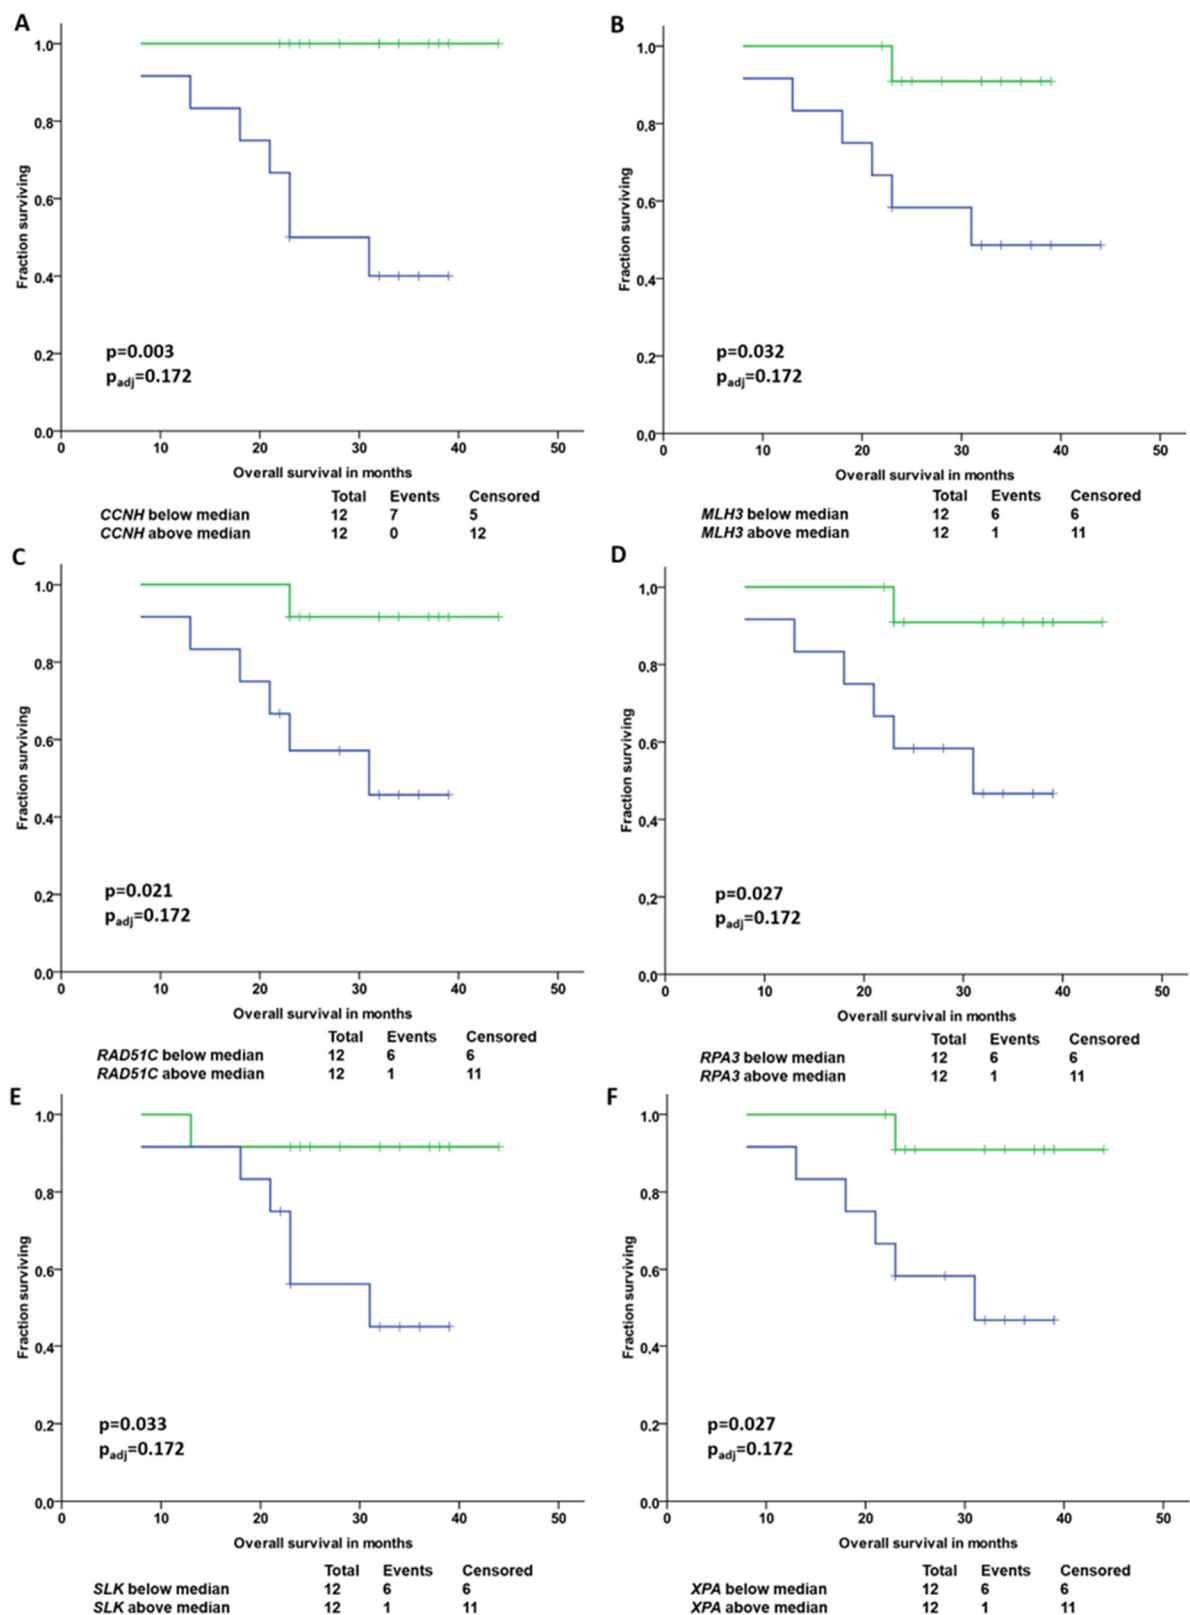

**Figure S8.** Significant associations of gene expression in primary tumor loci with overall survival Kaplan Meier survival curves for patient divided by median expression level of A - CCNH, B - MLH3, C - RAD51C, D - RPA3, E - SLK, and F - XPA. Green line - higher gene expression than median, blue line - lower gene expression than median.

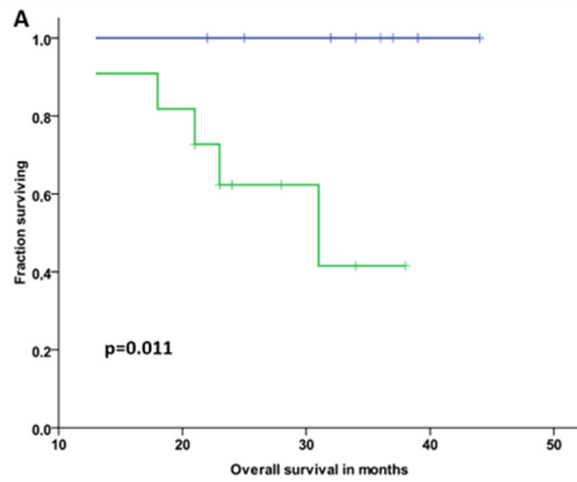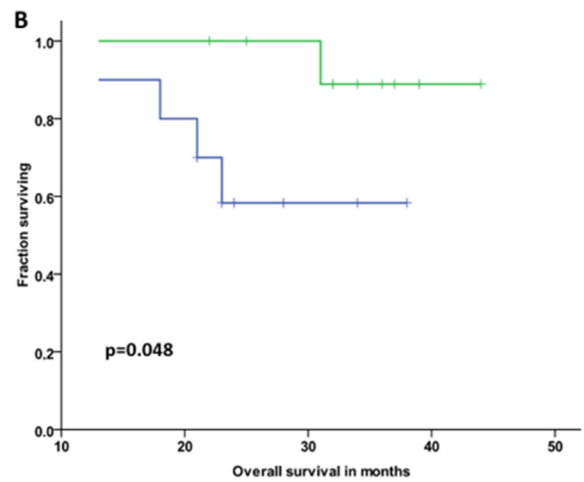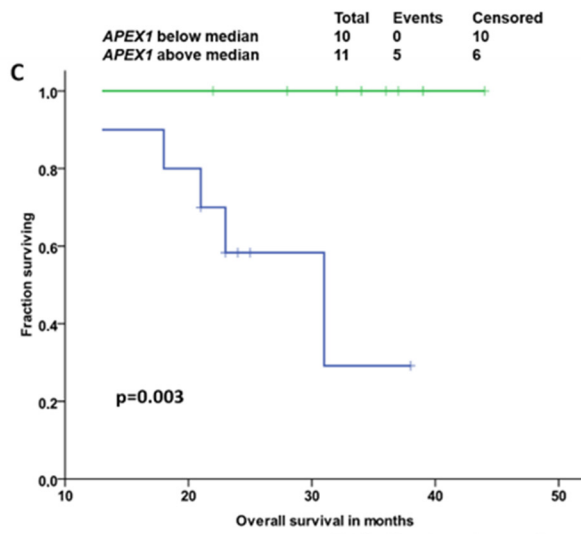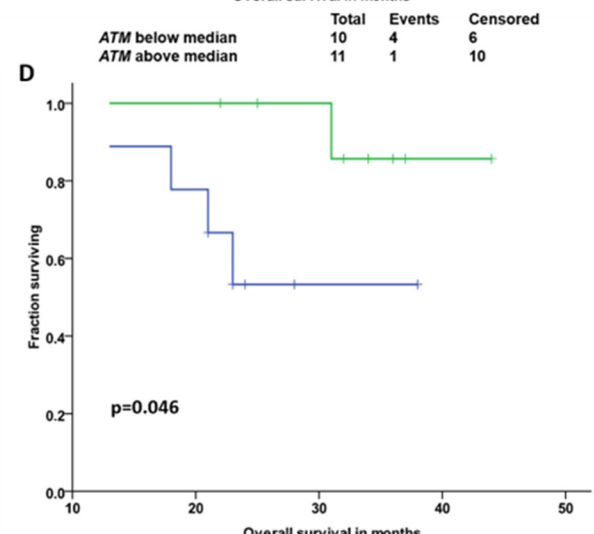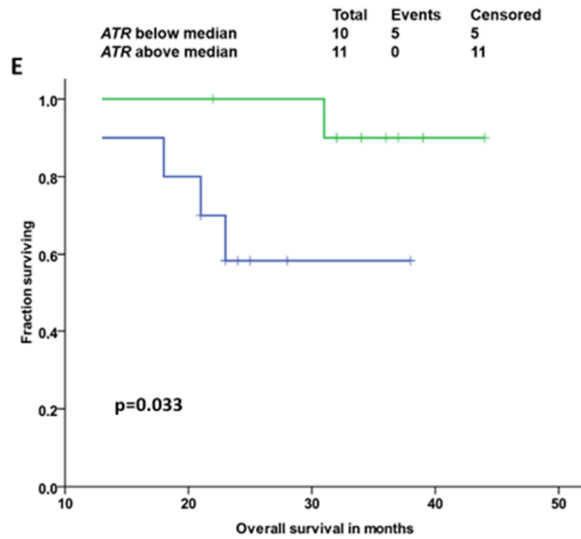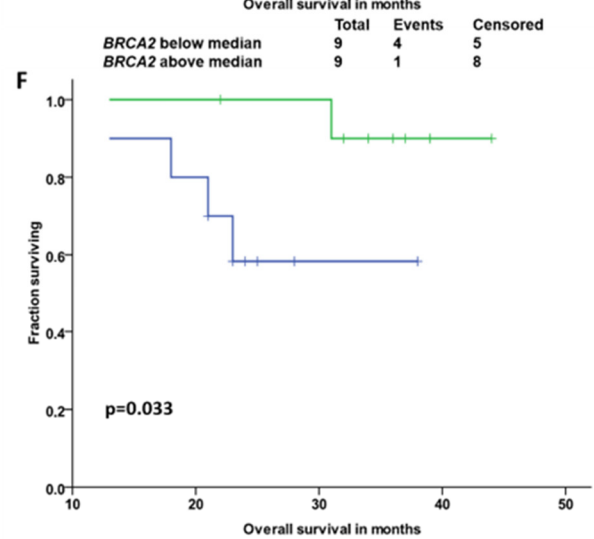

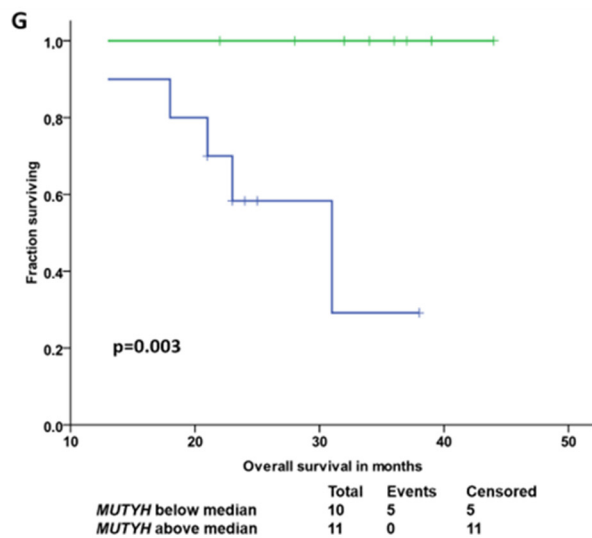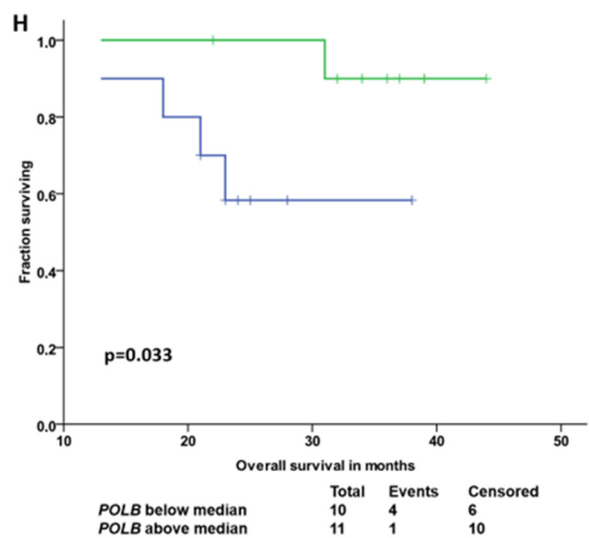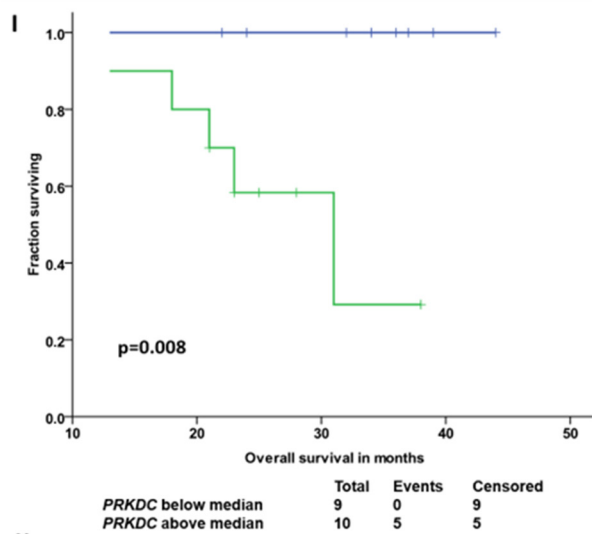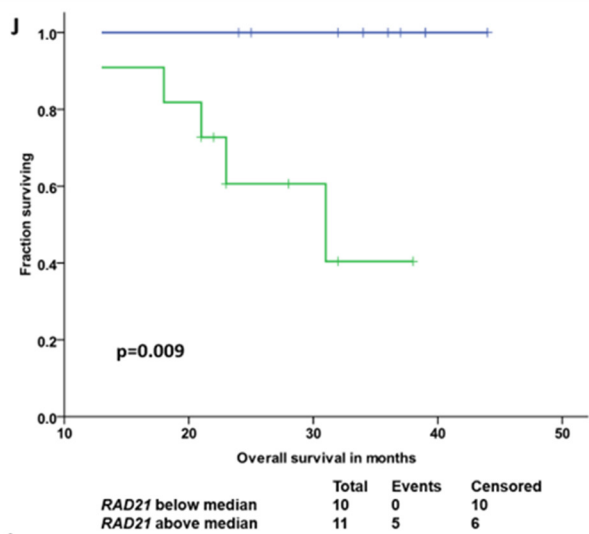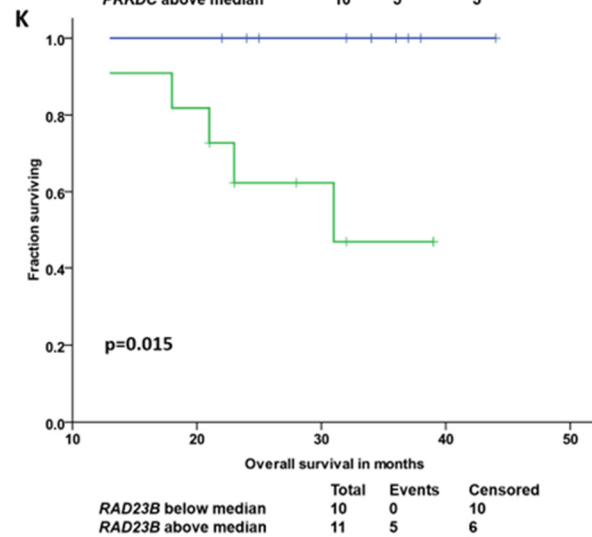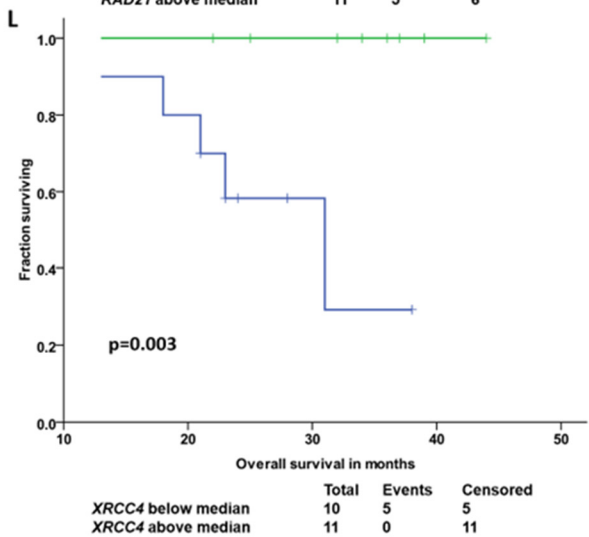

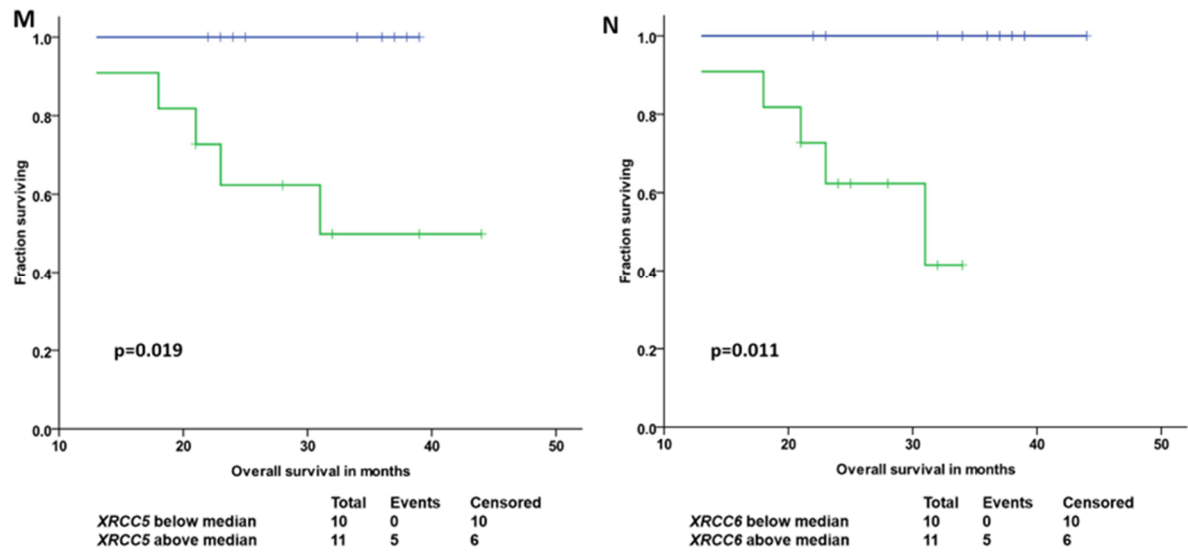

**Figure S9.** Significant associations of gene expression in metastatic loci with overall survival Kaplan Meier survival curves for patients divided by median expression level of A – *APEX1*, B – *ATM*, C – *ATR*, D – *BRCA2*, E – *CDK7*, F – *MSH2*, G – *MUTYH*, H – *POLB*, I – *PRKDC*, J – *RAD21*, K – *RAD23B*, L – *XRCC4*, M – *XRCC5*, and N – *XRCC6*. Green line - higher gene expression than median, blue line - lower gene expression than median.
